# Supplementary material for: Synthesis of bare and surface modified TiO2 nanoparticles via a single source precursor and insights into their interactions with serum albumin
Source: Royal Society of Chemistry journal article supplement (doi:10.1039/c8nj02253d), 2018-01-01
Supplement: c8nj02253d1.pdf [file c8nj02253d1.pdf]

**Synthesis of bare and surface modified TiO<sub>2</sub> nanoparticles *via* single source precursor and insights into their interactions with Serum Albumin**

**Aleem Ansari, Shilpee Sachar\* and Shivram S. Garje**

*Department of Chemistry, University of Mumbai, Vidyanaigari, Santacruz (East), Mumbai-400 098, India*

\* Author to whom correspondence should be addressed.

Email: [shilpee.sachar@chem.mu.ac.in](mailto:shilpee.sachar@chem.mu.ac.in), [dhamchem@gmail.com](mailto:dhamchem@gmail.com)

Tel: +91-22-26543594 Fax: +91-22-26528547

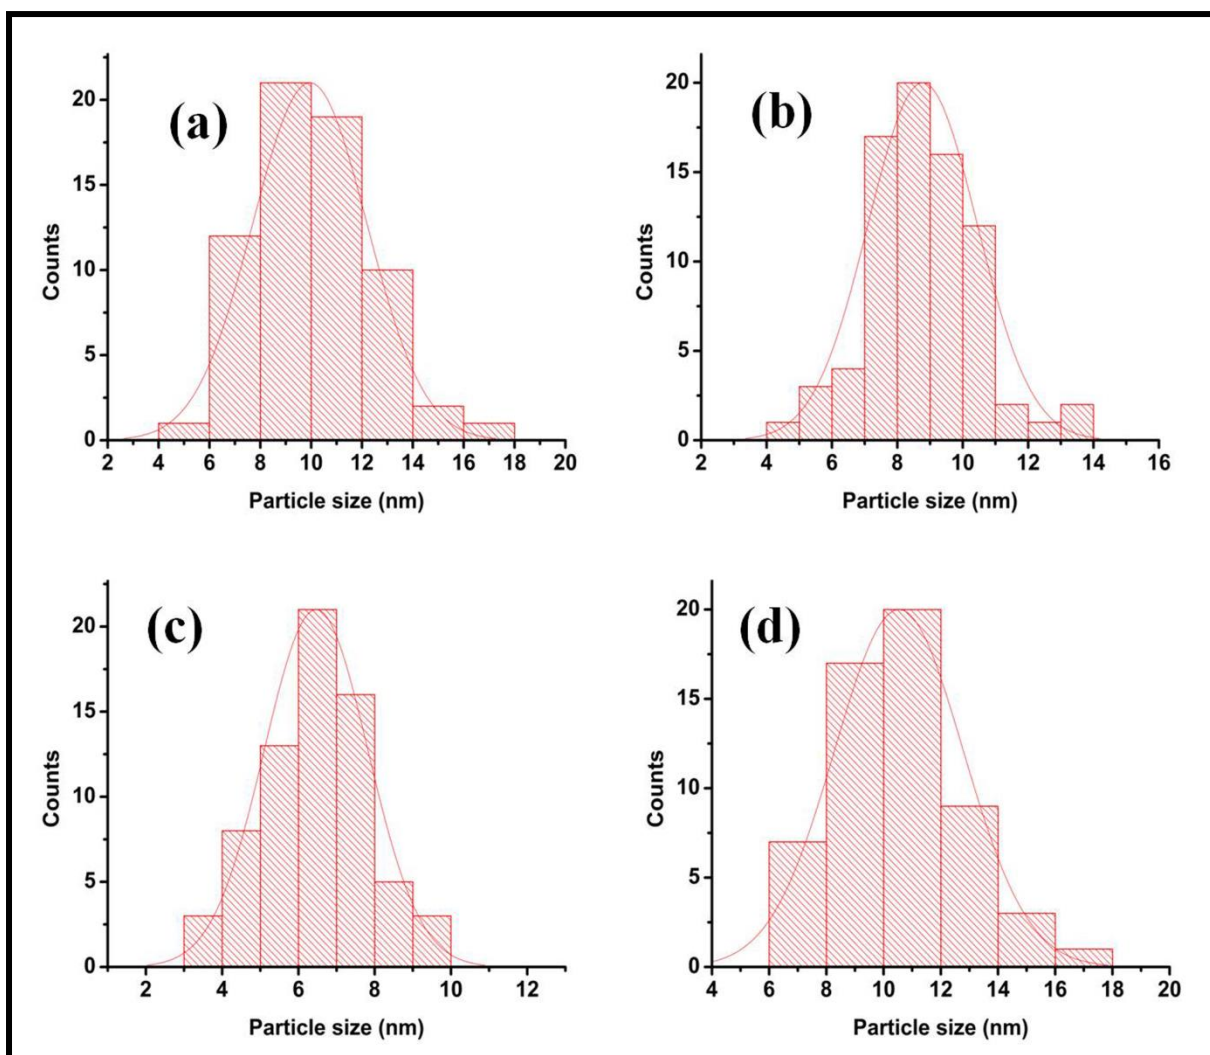

**Figure S1 (a).** Particle size distribution histogram of CTAB@TiO<sub>2</sub> (a), SDS@TiO<sub>2</sub> (b), Tween 80@TiO<sub>2</sub> (c), and EG@TiO<sub>2</sub> NPs (d).

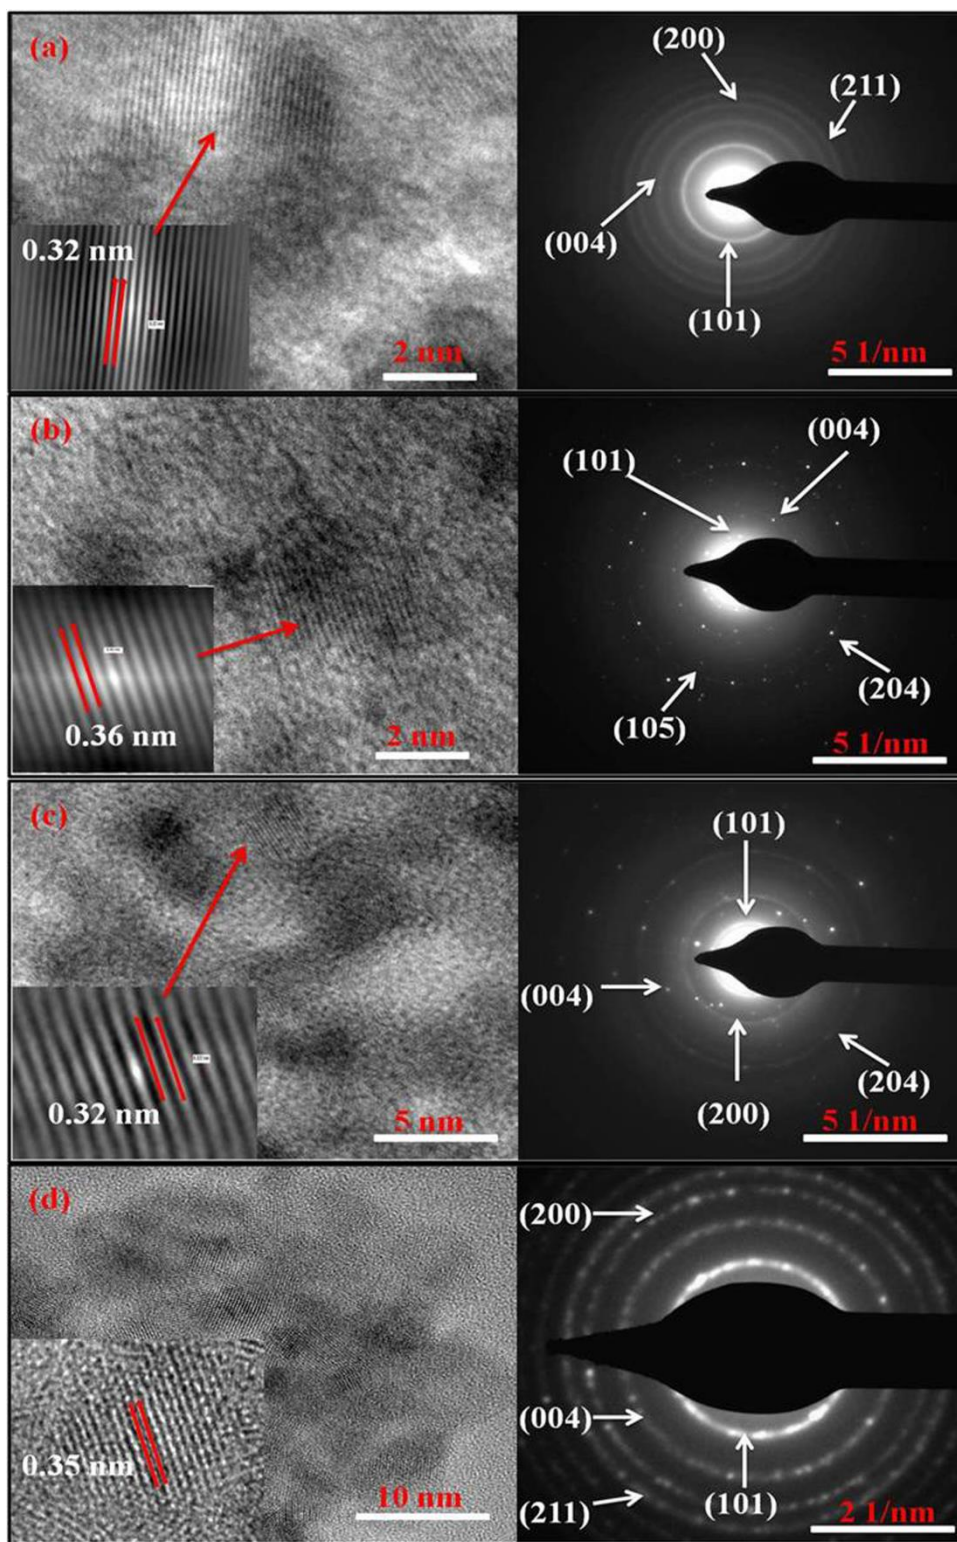

**Figure S1 (b).** HRTEM and SAED images of CTAB@TiO<sub>2</sub> (a), SDS@TiO<sub>2</sub> (b), Tween 80@TiO<sub>2</sub> (c), and EG@TiO<sub>2</sub> NPs (d).

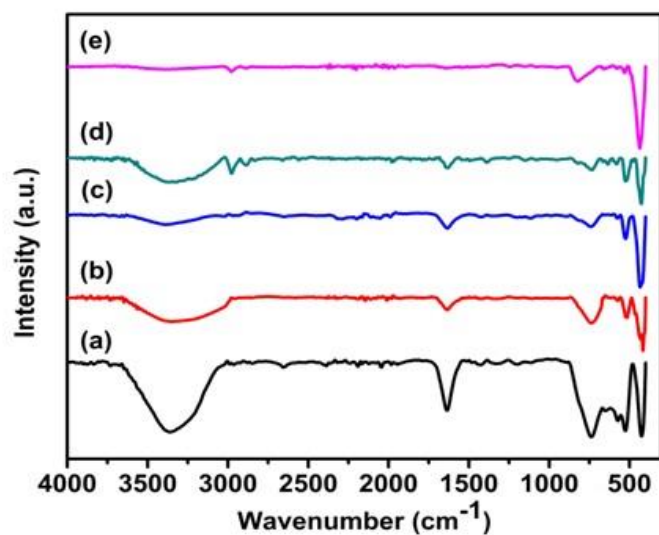

**Figure S2.** FTIR spectra of TiO<sub>2</sub> NPs bare (a), CTAB@TiO<sub>2</sub> (b), SDS@TiO<sub>2</sub> (c), Tween 80@TiO<sub>2</sub> (d) and EG@TiO<sub>2</sub> NPs (e).

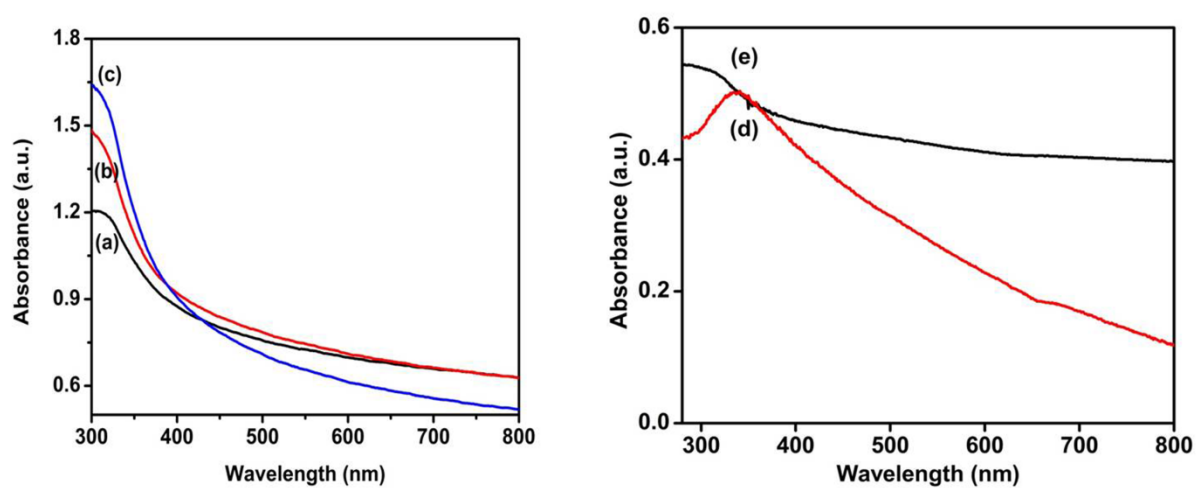

**Figure S3.** UV-Visible spectra of CTAB@TiO<sub>2</sub> (a), SDS@TiO<sub>2</sub> (b), Tween 80@TiO<sub>2</sub> (c), EG@TiO<sub>2</sub> (d) and bare TiO<sub>2</sub> (e).

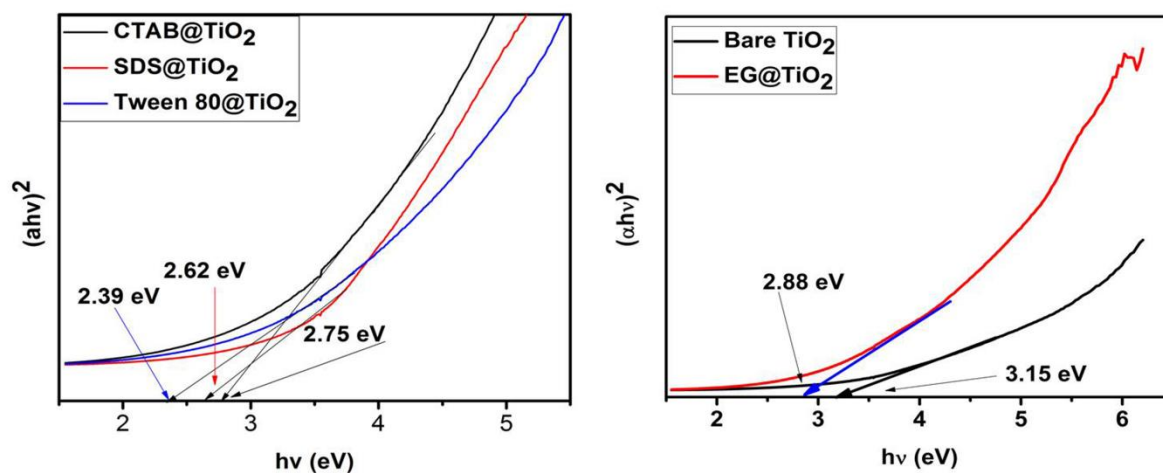

**Figure S4.** Tauc's plot of CTAB@TiO<sub>2</sub>, SDS@TiO<sub>2</sub>, Tween 80@TiO<sub>2</sub>, EG@TiO<sub>2</sub> and bare TiO<sub>2</sub> NPs.

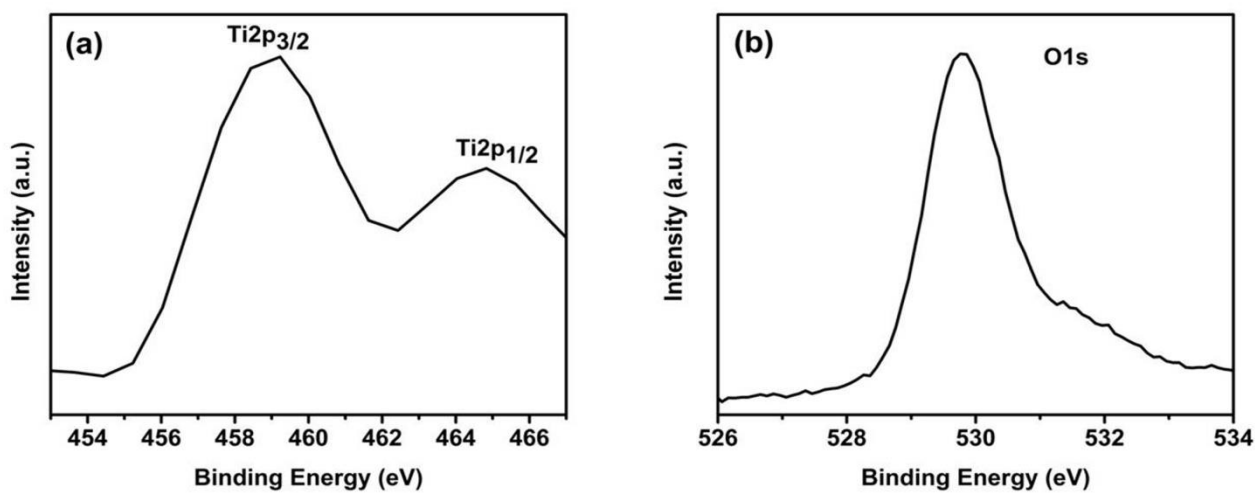

**Figure S5.** XPS spectra for (a) Ti 2p and (b) O 1s of as-synthesized bare TiO<sub>2</sub> NPs.

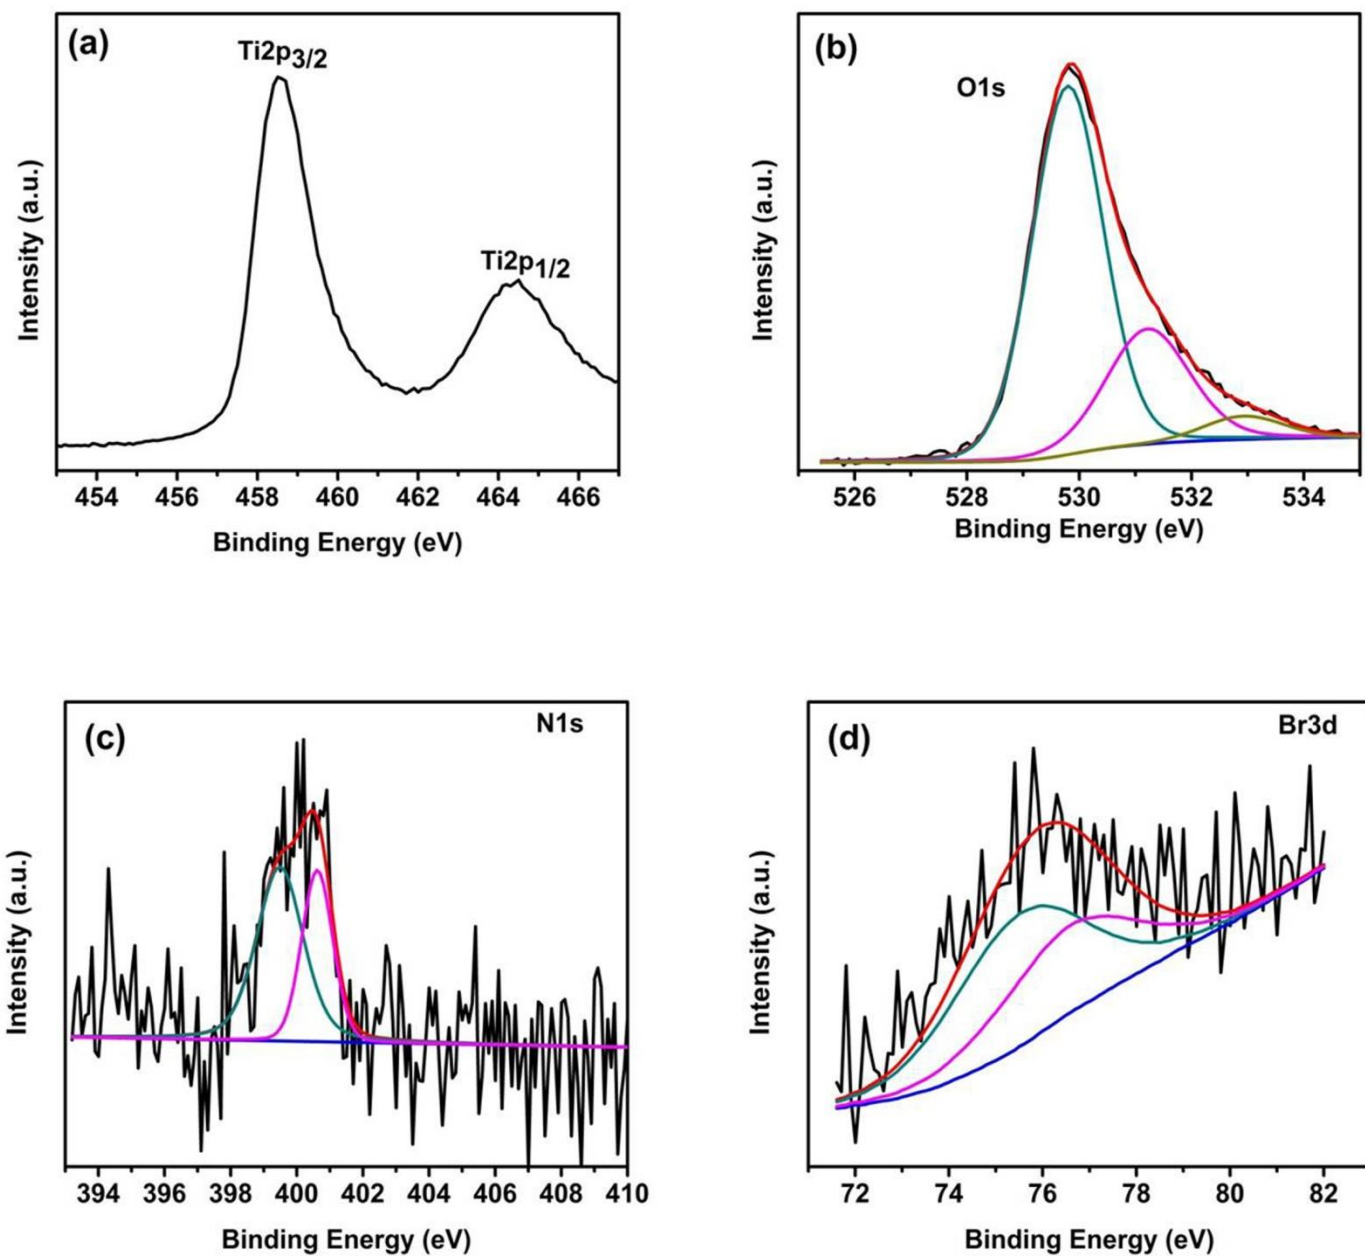

**Figure S6.** XPS spectra for (a) Ti 2p, (b) O 1s, (c) N 1s and (d) Br 3d of the as-synthesized CTAB@TiO<sub>2</sub> NPs.



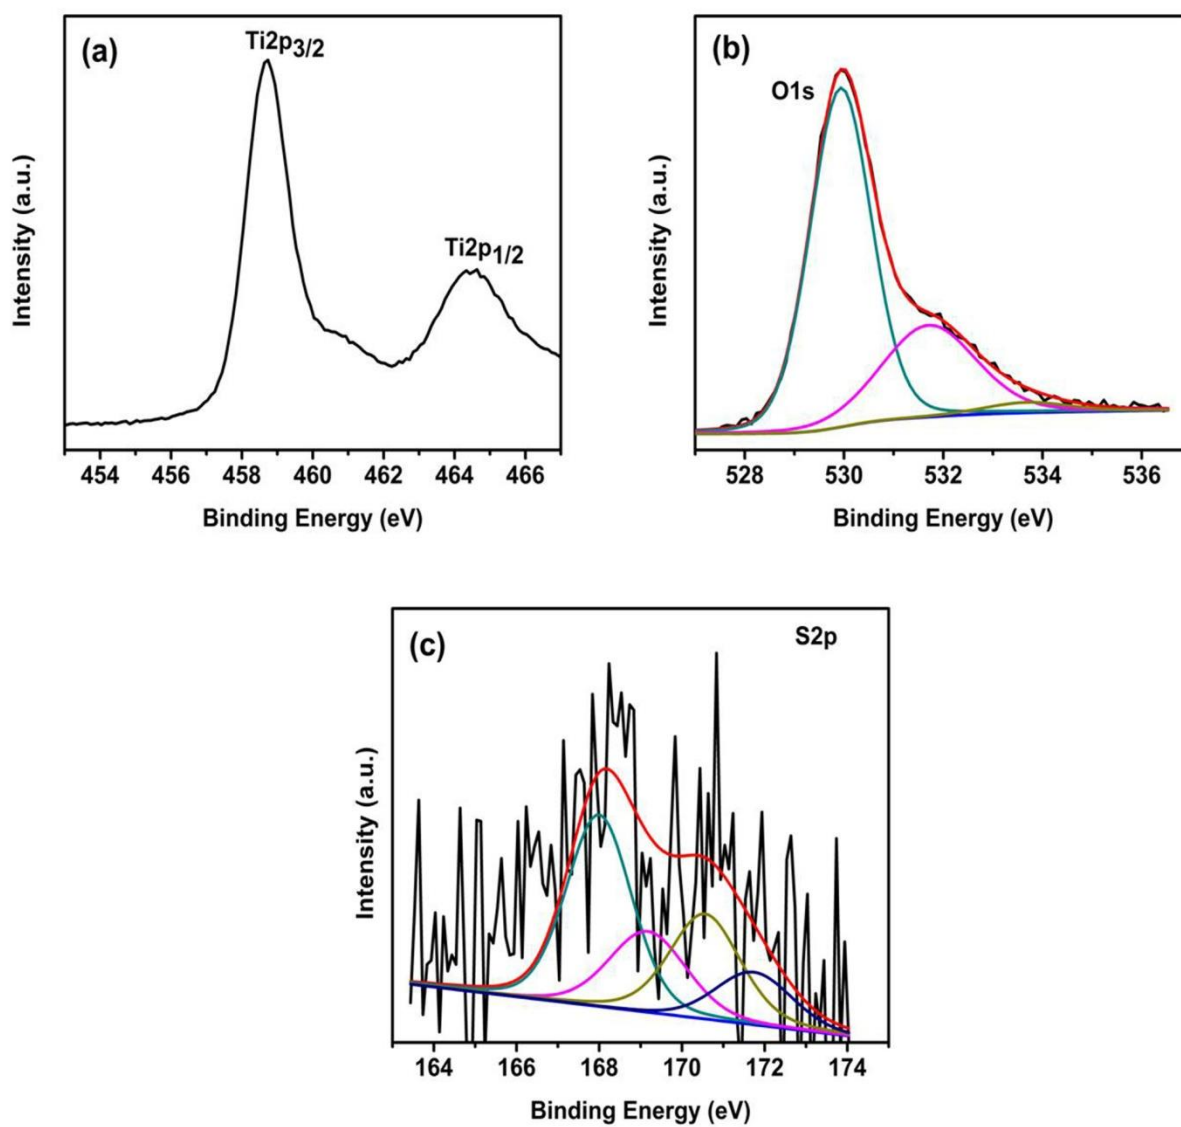

**Figure S7.** XPS spectra for (a) Ti 2p, (b) O 1s and (c) S 2p of the as-synthesized SDS@TiO<sub>2</sub> NPs.

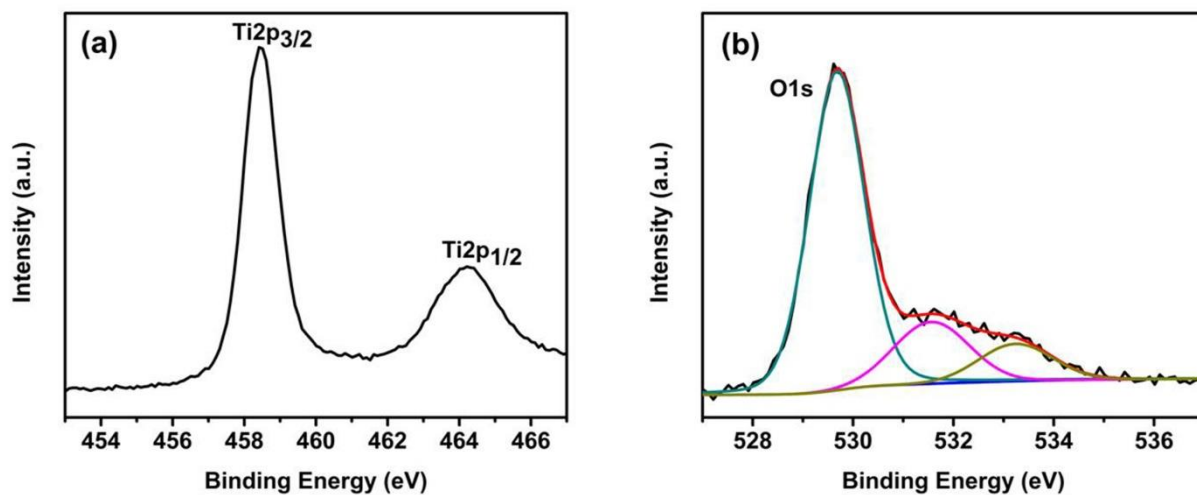

**Figure S8.** XPS spectra for (a) Ti 2p and (b) O 1s of the as-synthesized Tween 80@TiO<sub>2</sub> NPs.

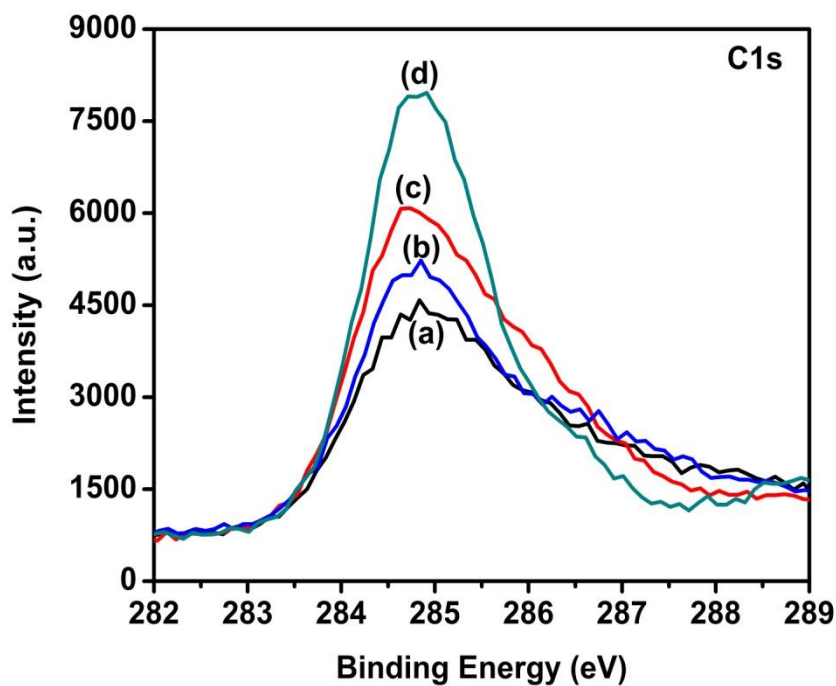

**Figure S9.** XPS spectra of all C 1s for (a) bare TiO<sub>2</sub> NPs, (b) SDS@TiO<sub>2</sub> NPs, (c) CTAB@TiO<sub>2</sub> NPs and (d) Tween 80@TiO<sub>2</sub> NPs.



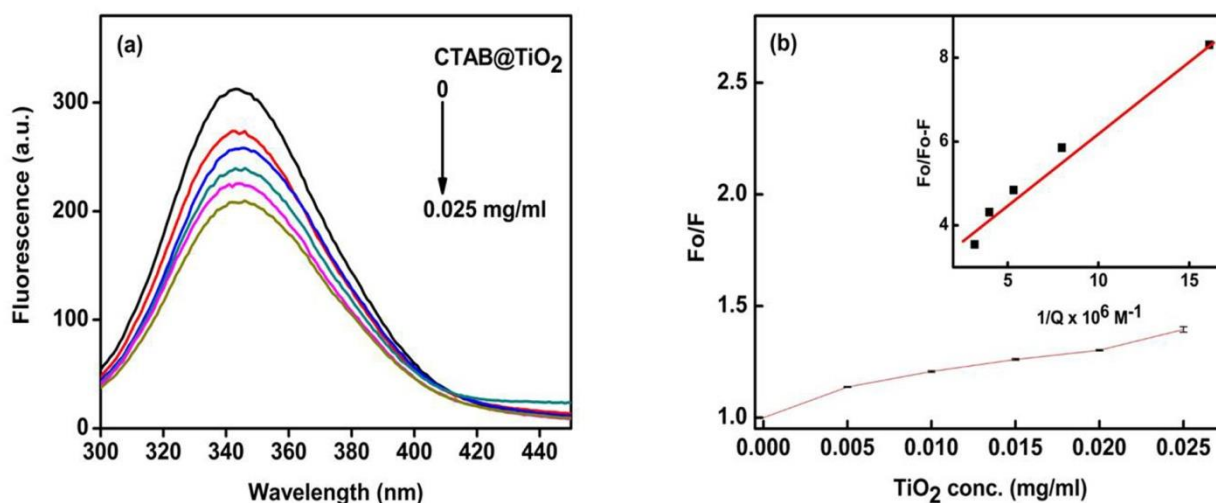

**Figure S10.** (a) Fluorescence spectra of BSA in absence and presence of varying CTAB@TiO<sub>2</sub> NPs, 10b: Plot of  $F_0/F$  versus TiO<sub>2</sub> concentration at 343 nm,  $SD = \pm 0.008$  for  $n = 3$  and inset: Plot of  $F_0/(F_0-F)$  versus  $1/[Q]$ .

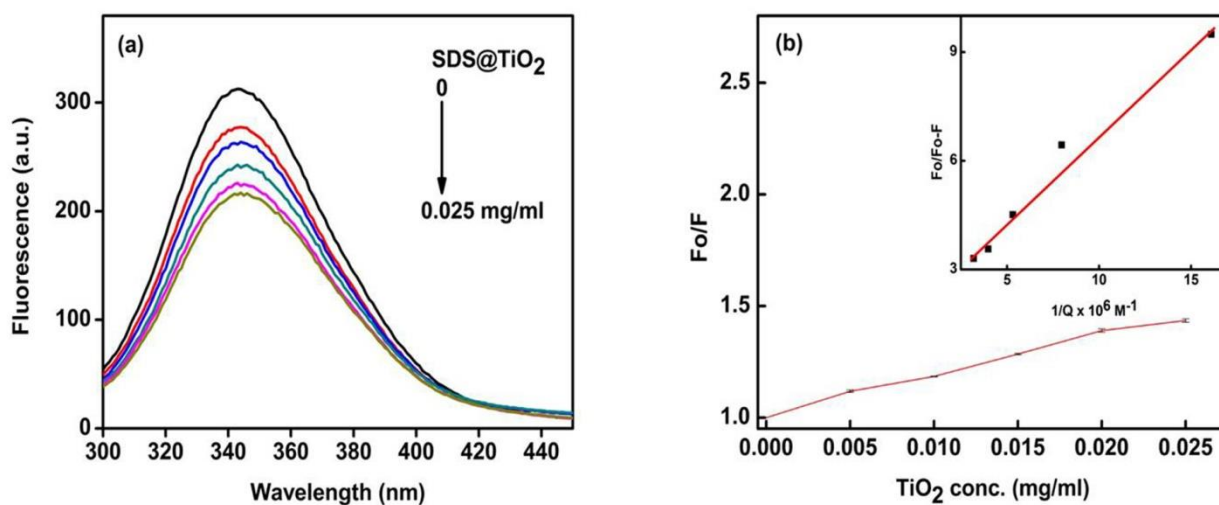

**Figure S11.** (a) Fluorescence spectra of BSA in absence and presence of varying SDS@TiO<sub>2</sub> NPs, 11b: Plot of  $F_0/F$  versus TiO<sub>2</sub> concentration at 343 nm,  $SD = \pm 0.008$  for  $n = 3$  and inset: Plot of  $F_0/(F_0-F)$  versus  $1/[Q]$ .

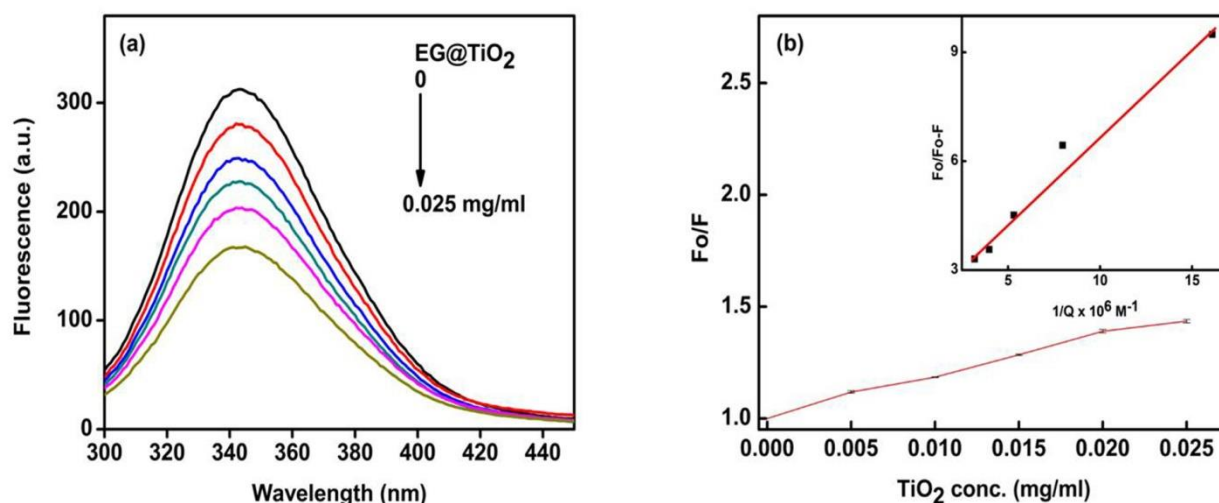

**Figure S12.** (a) Fluorescence spectra of BSA in absence and presence of varying EG@TiO<sub>2</sub> NPs, 12b: Plot of  $F_0/F$  versus TiO<sub>2</sub> concentration at 343 nm, SD =  $\pm 0.004$  for n = 3 and inset: Plot of  $F_0/(F_0-F)$  versus  $1/[Q]$ .

**Table S1** Hydrodynamic size and PDI of bare and surface modified TiO<sub>2</sub> NPs in absence and presence of BSA.

| System                   | 0h   |      | 24h  |      | System                        | 0h   |      | 24h  |      |
|--------------------------|------|------|------|------|-------------------------------|------|------|------|------|
|                          | PDI  | Size | PDI  | Size |                               | PDI  | Size | PDI  | Size |
| Bare TiO <sub>2</sub>    | 1.00 | 186  | 1.00 | 350  | Bare TiO <sub>2</sub> +BSA    | 1.00 | 274  | 0.95 | 429  |
| CTAB@TiO <sub>2</sub>    | 1.00 | 153  | 0.90 | 274  | CTAB@TiO <sub>2</sub> +BSA    | 0.78 | 248  | 0.74 | 251  |
| SDS@TiO <sub>2</sub>     | 1.00 | 122  | 1.00 | 255  | SDS@TiO <sub>2</sub> +BSA     | 1.00 | 239  | 0.88 | 263  |
| Tween80@TiO <sub>2</sub> | 0.64 | 235  | 0.47 | 284  | Tween80@TiO <sub>2</sub> +BSA | 0.69 | 256  | 0.67 | 270  |
| EG@TiO <sub>2</sub>      | 1.00 | 86   | 1.00 | 96   | EG@TiO <sub>2</sub> +BSA      | 1.00 | 92   | 1.00 | 146  |
